# Supplementary material for: A nonlinear optical cadmium(ii)-based metal–organic framework with chiral helical chains derived from an achiral bent dicarboxylate ligand
Source: Royal Society of Chemistry journal article supplement (doi:10.1039/d0ce01517b), 2020-12-09
Supplement: d0ce01517b1.pdf [file d0ce01517b1.pdf]

## Supporting information for

### **A Nonlinear Optical Cadmium(II)-Based Metal–Organic Framework with Chiral Helical Chains Derived from an Achiral Bent Dicarboxylate Ligand**

Kai Ting Hsu,<sup>a,b,c</sup> Pounraj Thanasekaran,<sup>a</sup> Ting-Wei Hsu,<sup>b</sup> Cing-Huei Su,<sup>a</sup> Bor-Chen Chang,<sup>c</sup> Yen-Hsiang Liu,<sup>a,\*</sup> Chen-Hsiung Hung,<sup>b,\*</sup> and Kuang-Lieh Lu<sup>a,b,\*</sup>

<sup>a</sup>*Department of Chemistry, Fu Jen Catholic University, New Taipei City 242, Taiwan*

<sup>b</sup>*Institute of Chemistry, Academia Sinica, Taipei 115, Taiwan*

<sup>c</sup>*Department of Chemistry, National Central University, Taoyuan 320, Taiwan*

\*E-Mail: 056461@gapp.fju.edu.tw (Y.-H. Liu)

\*E-Mail: chhung@gate.sinica.edu.tw (C.-H. Hung)

\*E-Mail: kllu@gate.sinica.edu.tw (K.-L. Lu)

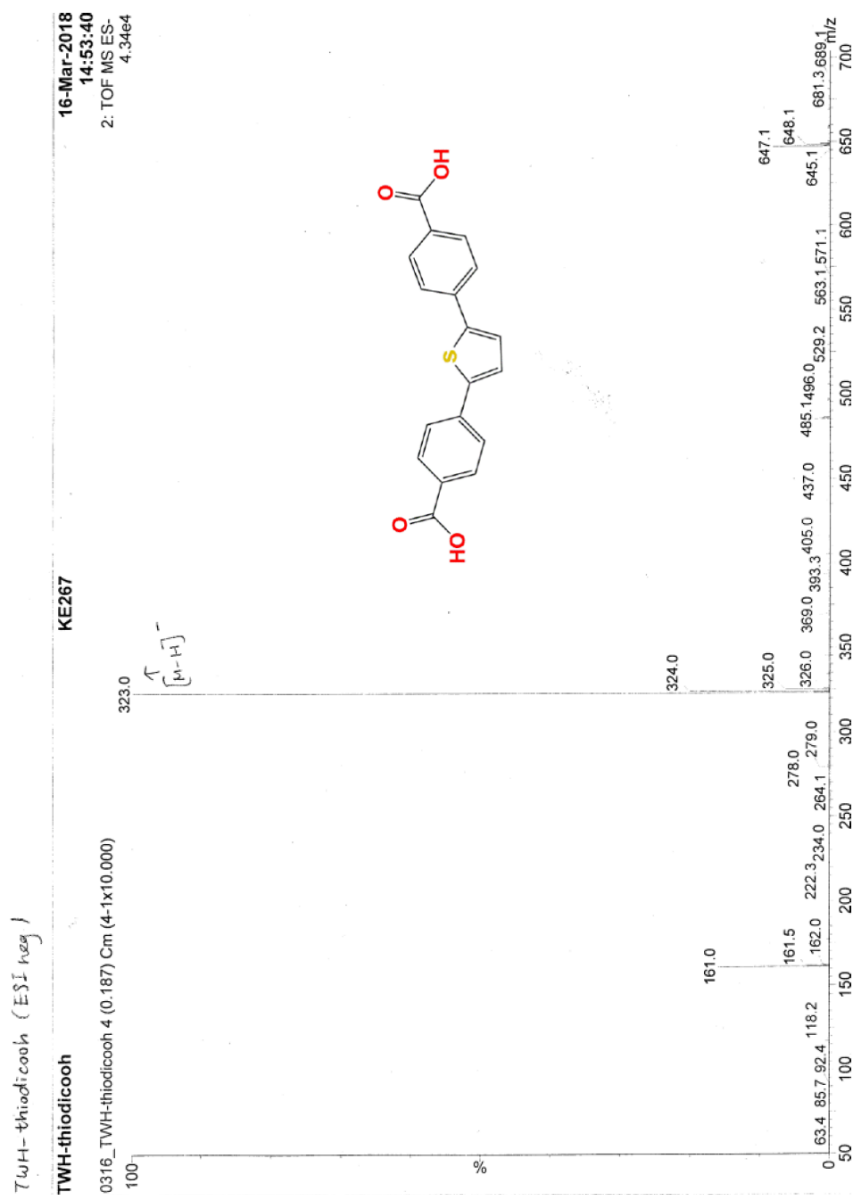

Fig. S1. ESI-MS spectrum of H<sub>2</sub>TDB ligand.

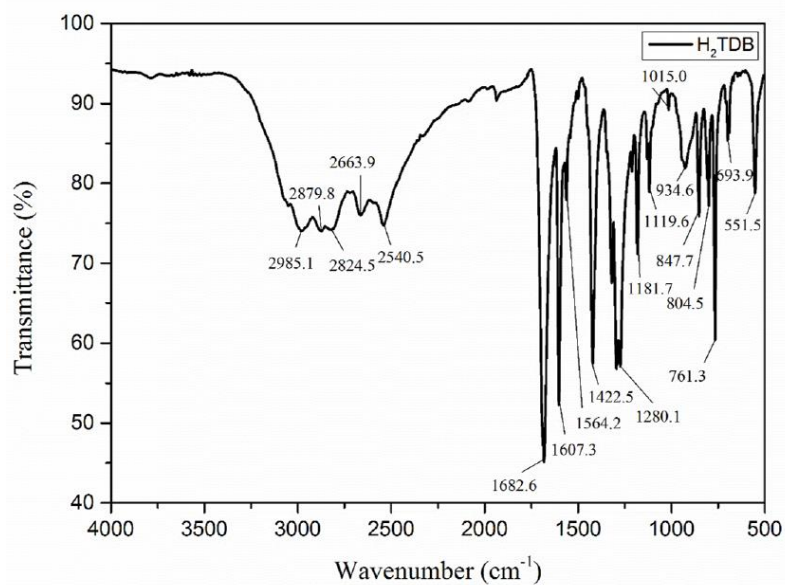

**Fig. S2.** FT-IR spectrum of H<sub>2</sub>TDB ligand.

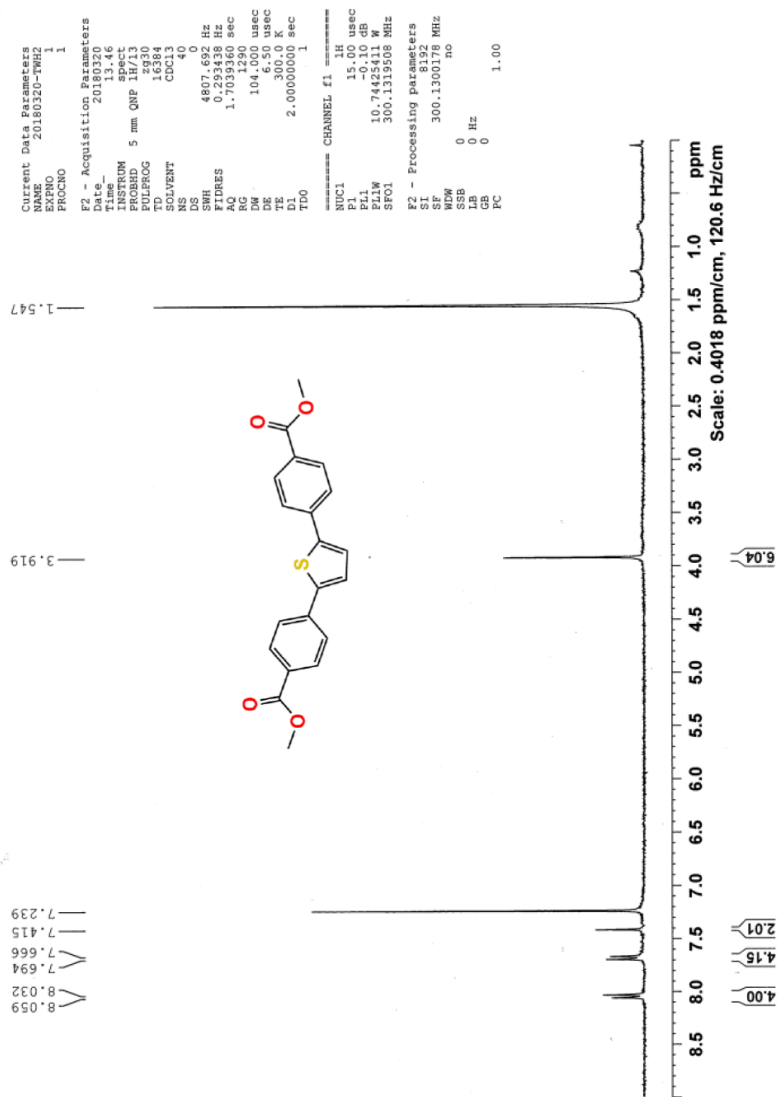

**Fig. S3.**  $^1\text{H}$  NMR spectrum of 2,5-TDBMe ligand in  $\text{CDCl}_3$ .

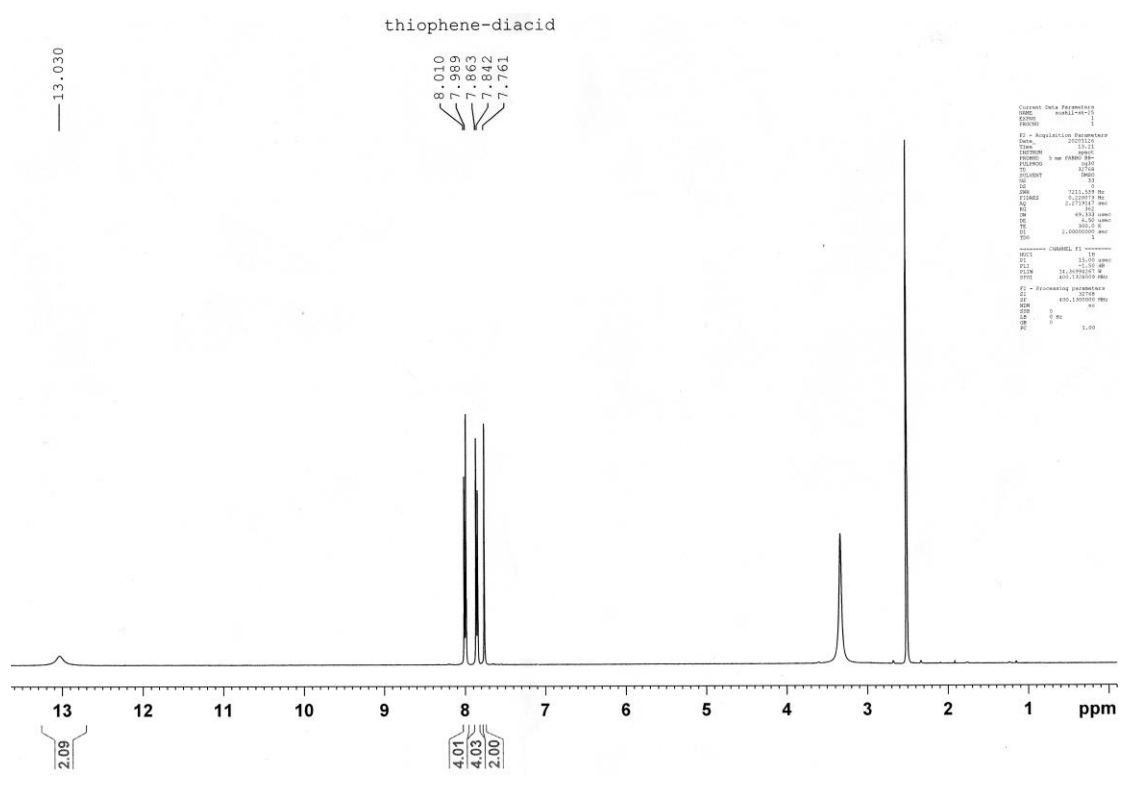

**Fig. S4.** <sup>1</sup>H NMR spectrum of H<sub>2</sub>TDB in DMSO.



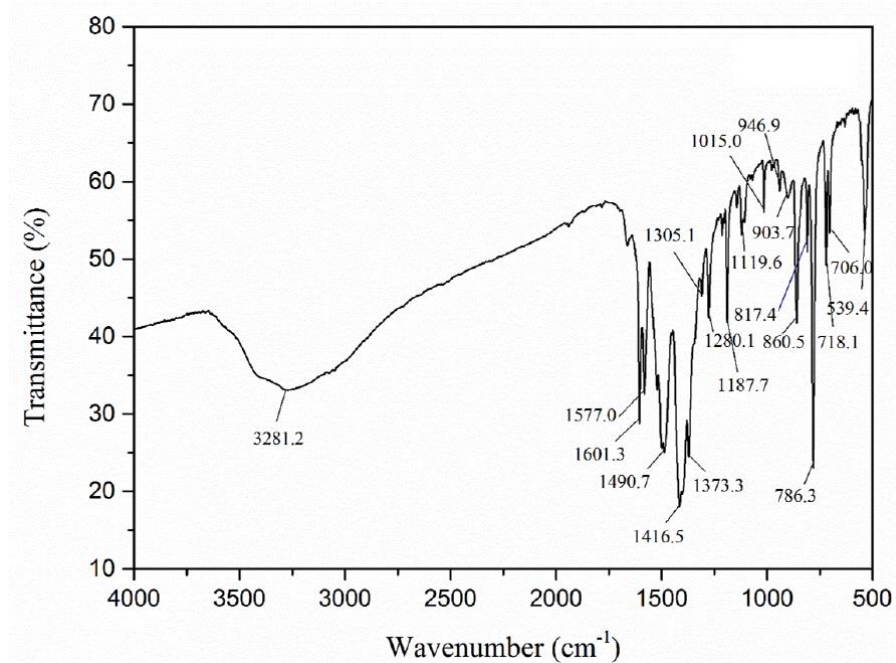

**Fig. S6.** FT-IR spectrum of compound **1**.

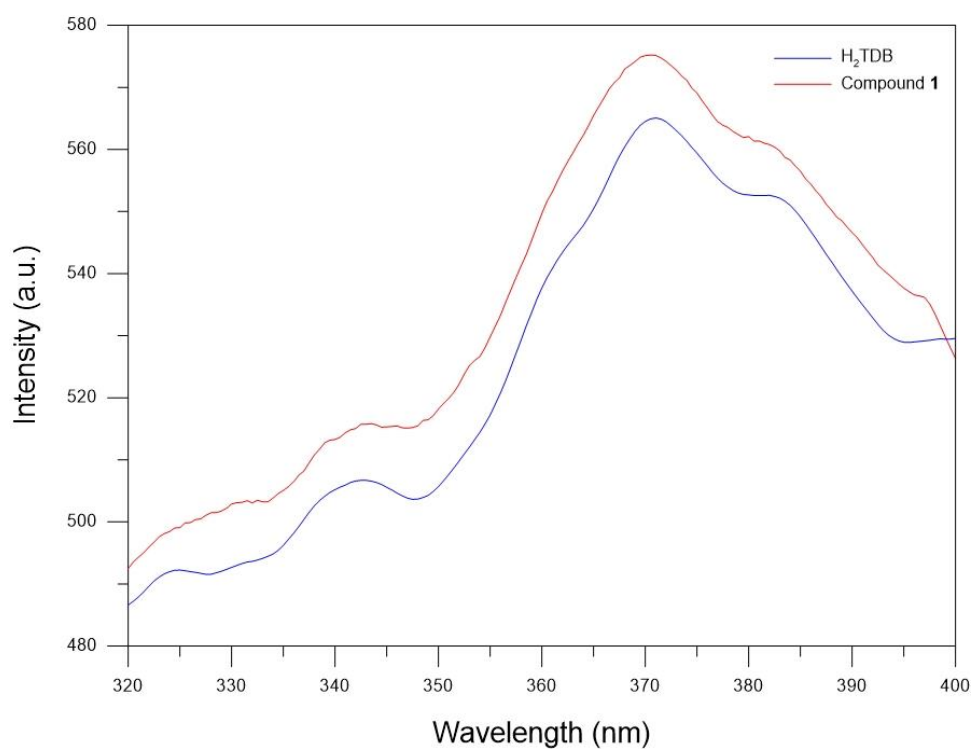

**Fig. S7.** Solid-state excitation spectra of the H<sub>2</sub>TDB ligand and compound **1**.

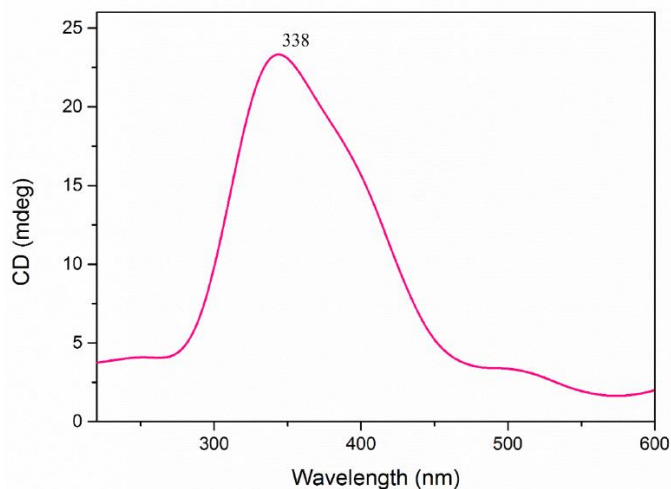

**Fig. S8.** Solid-state CD spectrum of compound **1**.

**Table S1.** Selected hydrogen bond geometry ( $\text{\AA}$ ,  $^\circ$ ).

| Donor–H                            | Donor...Acceptor             | H...Acceptor                           | Donor–H...Acceptor                                 |
|------------------------------------|------------------------------|----------------------------------------|----------------------------------------------------|
| O11–H11A<br>0.979 (0.000)<br>0.938 | O11–O3 (7)<br>2.799 (0.000)  | H11A–O3 (7)<br>2.082 (0.000)<br>2.108  | O11–H11A...O3 (7)<br>128.53 (0.01)<br>129.41 (**)  |
| O11–H11A<br>0.979 (0.000)<br>0.938 | O11–O11 (8)<br>3.024 (0.000) | H11A–O11 (8)<br>2.680 (0.000)<br>2.688 | O11–H11A...O11 (8)<br>100.97 (0.00)<br>101.84 (**) |
| O11–H11B<br>0.980 (0.000)<br>0.938 | O11–O11 (8)<br>3.024 (0.000) | H11B–O11 (8)<br>2.797 (0.000)<br>2.800 | O11–H11B...O11 (8)<br>93.77 (0.00)<br>94.63 (**)   |
| O11–H11B<br>0.980 (0.000)<br>0.938 | O11–O2 (9)<br>2.796 (0.000)  | H11B–O2 (9)<br>2.070 (0.000)<br>2.097  | O11–H11B...O2 (9)<br>129.34 (0.01)<br>130.23 (**)  |

(\*\*) Values normalized following the refs. (a) G. A. Jeffrey and L. Lewis, *Carbohydr. Res.* **1978**, *60*,179; (b) R. Taylor and O. Kennard, *Acta Cryst.* **1983**, *B39*, 133.

Equivalent positions:

- (0) x, y, z
- (1) -x+2, +y-1/2, -z
- (2) x, +y-1, +z
- (3) x, +y+1, +z
- (4) x, +y+1, +z-1
- (5) x, +y+1, +z+1
- (6) x, +y, +z-1
- (7) -x+1, +y+1/2, -z+2
- (8) -x+1, +y-1/2, -z+1
- (9) -x+1, +y+1/2, -z+1
- (10) -x+2, +y+1/2, -z+1
